# Supplementary material
Source: PubMed Central journal article supplement (PMC6554192)
Supplement: supplementary_figure_s1_dez041.pdf [file supplementary_figure_s1_dez041.pdf]

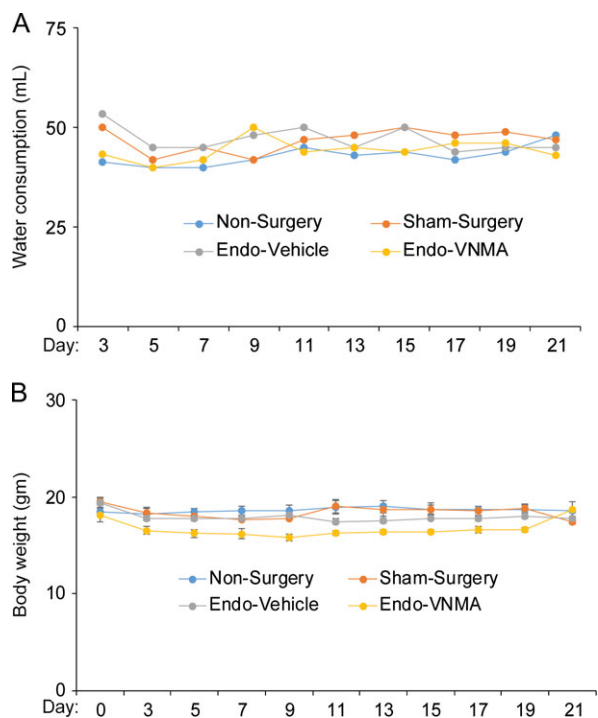

**Supplementary Figure S1 Surgery and antibiotic treatment have no effect on water consumption or body weight.**

Graphs show the water consumption (A) and body weight (B) of mice ( $n = 5$  per group) in the indicated treatment groups on the indicated days after surgery. Differences in water consumption or body weights of the different groups of mice at any given time point were not statistically significant.
