# Supplementary material
Source: PubMed Central journal article supplement (PMC6554192)
Supplement: supplementary_figure_s2_dez041.pdf [file supplementary_figure_s2_dez041.pdf]

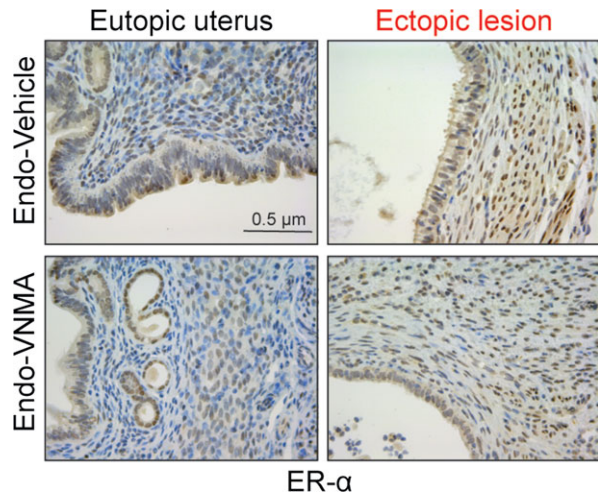

**Supplementary Figure S2** The effect of antibiotic treatment on endometriotic lesion progression is independent of estrogen receptor alpha. **(A)** Representative ER- $\alpha$  immunohistochemistry images of the eutopic uteri and ectopic lesions from the indicated treatment groups. The scale bar (0.5  $\mu\text{m}$ ) applies to all images;  $n = 5$ .
