# Supplementary material
Source: PubMed Central journal article supplement (PMC6554192)
Supplement: supplementary_figure_s3_dez041.pdf [file supplementary_figure_s3_dez041.pdf]

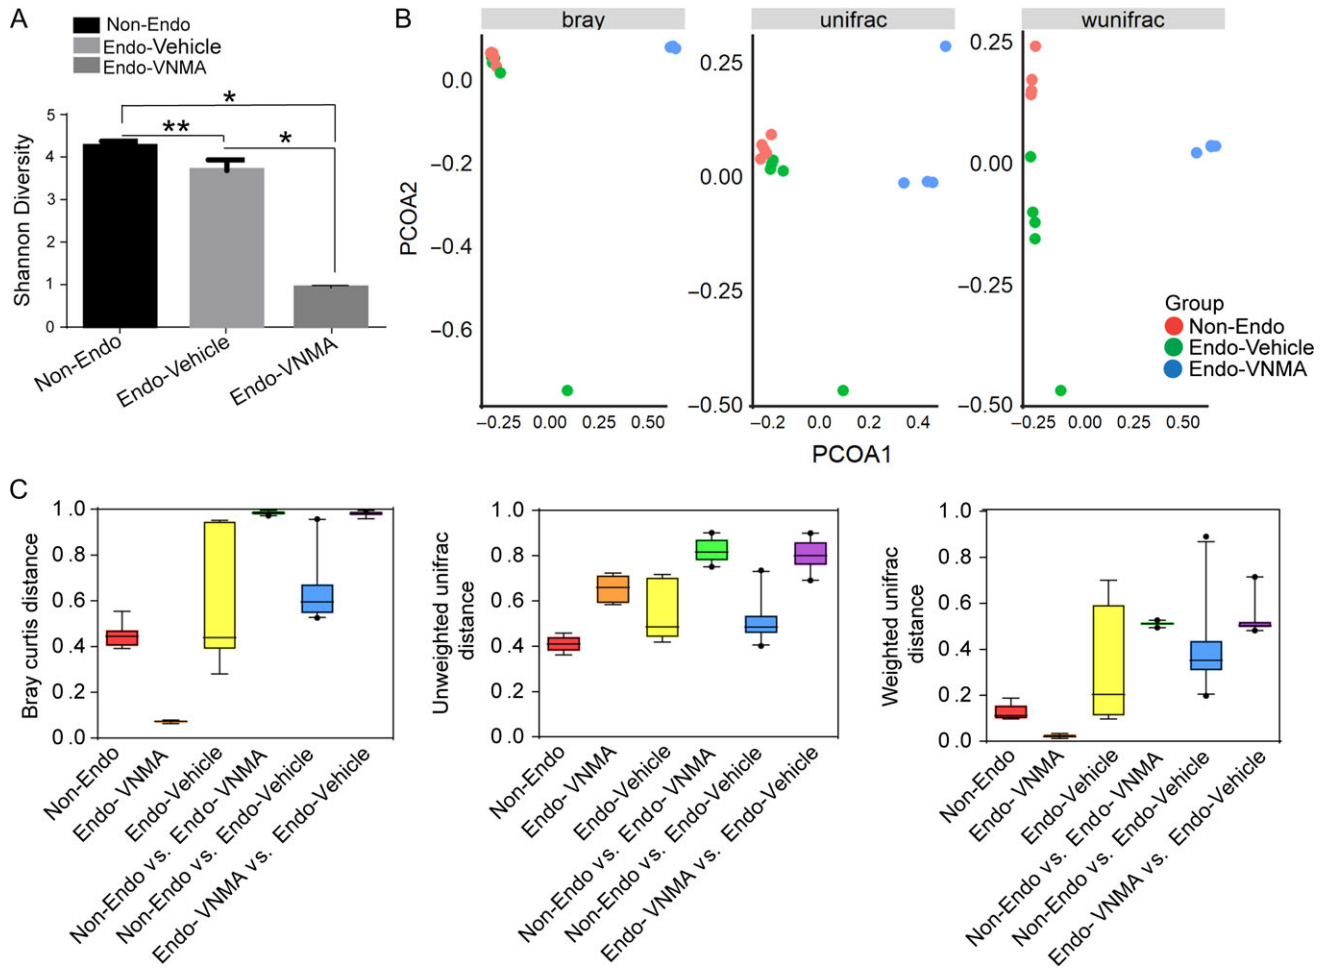

**Supplementary Figure S3 Microbial diversity analysis.** (A) Intra-group Shannon diversity analysis of faecal samples from the indicated groups. (B) MDS/PCoA analysis of faecal microbiota from the indicated treatment groups. PERMANOVA: bray curtis (bray)  $P = 0.001$ ; unweighted UniFrac (unifrac)  $P = 0.001$ ; weighted UniFrac (wunifrac)  $P = 0.001$ . (C) Average pairwise intra-group and intergroup distances were calculated with the indicated metrics and presented as box-and-whiskers plots ( $n = 4-5$ ).
