# Supplementary material
Source: PubMed Central journal article supplement (PMC6554192)
Supplement: supplementary_figure_s4_dez041.pdf [file supplementary_figure_s4_dez041.pdf]

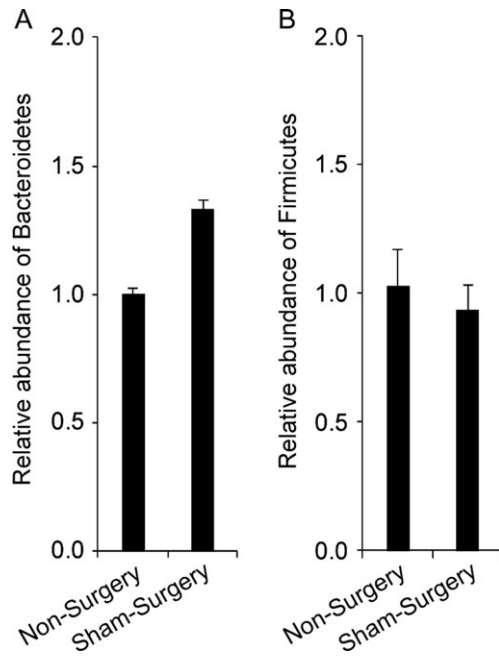

**Supplementary Figure S4 Sham surgery had no effect on endometriosis-associated bacteria.** Quantification of relative abundances of Bacteroidetes (**A**) and Firmicutes (**B**) in faeces from mice in the indicated groups. Data are presented as mean  $\pm$  SE ( $n = 5$ ).
