# Supplementary material
Source: PubMed Central journal article supplement (PMC6554192)
Supplement: supplementary_figure_s5_dez041.pdf [file supplementary_figure_s5_dez041.pdf]

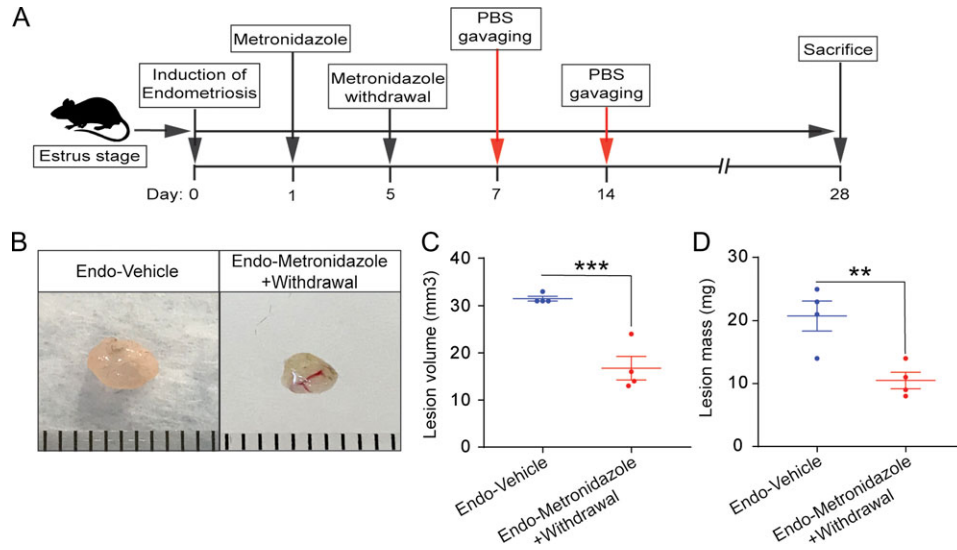

**Supplementary Figure S5 Withdrawal of metronidazole does not restore endometriotic lesion growth.** (A) Schematic of experimental timeline and procedures. (B–D) Representative gross images (B), volumes (C) and masses (D) of ectopic endometriotic lesions from the indicated treatment groups 28 days after surgical induction of endometriosis. Data are presented as mean  $\pm$  SE; ( $n = 4$ ) \*\* $P < 0.01$  and \*\*\* $P < 0.001$ .
